# Supplementary material for: Geometric and dosimetric evaluations of atlas-based segmentation methods of MR images in the head and neck region
Source: PubMed Central journal article supplement (PMC6296440; doi:10.1088/1361-6560/aacb65), 2018-07-11
Supplement: NIHMS80763-supplement-Appendix.pdf [file NIHMS80763-supplement-Appendix.pdf]

**Appendix A. Clinical treatment planning goals**

Table A1: Clinical treatment planning goals according to our institution's clinical protocol, prescribing a mean dose of 65 and 54 Gy to the primary and secondary planning target volumes (PTV), respectively. Depending on the clinical case, priorities 2a and 2b can change order.

| priority | volume of interest       | clinical goal                               |
|----------|--------------------------|---------------------------------------------|
| 1        | spinal cord              | $D_{1cc} < 46 \text{ Gy}$                   |
| 1        | spinal cord + 3mm PRV    | $D_{1cc} < 48 \text{ Gy}$                   |
| 1        | brainstem                | $D_{1cc} < 54 \text{ Gy}$                   |
| 1        | brainstem + 3mm PRV      | $D_{1cc} < 56 \text{ Gy}$                   |
| 2a       | primary PTV              | $D_{99\%} > 90\% \text{ of } 65 \text{ Gy}$ |
| 2a       | primary PTV              | $D_{95\%} > 95\% \text{ of } 65 \text{ Gy}$ |
| 2a       | primary PTV              | $D_{50\%} = 65 \pm 1 \text{ Gy}$            |
| 2a       | secondary PTV            | $D_{99\%} > 90\% \text{ of } 54 \text{ Gy}$ |
| 2a       | secondary PTV            | $D_{95\%} > 95\% \text{ of } 54 \text{ Gy}$ |
| 2a       | secondary PTV            | $D_{50\%} = 54 \pm 1 \text{ Gy}$            |
| 2b       | optical nerves           | $D_{1cc} < 54 \text{ Gy}$                   |
| 2b       | optical nerves + 1mm PRV | $D_{1cc} < 55 \text{ Gy}$                   |
| 2b       | chiasm                   | $D_{1cc} < 55 \text{ Gy}$                   |
| 2b       | chiasm + 1mm PRV         | $D_{1cc} < 56 \text{ Gy}$                   |
| 2b       | optical lenses           | $D_{\text{mean}} < 6 \text{ Gy}$            |
| 3        | parotids                 | $D_{\text{mean}} < 26 \text{ Gy}$           |
